# Supplementary material
Source: Springer Nature journal article supplement (https://www.springermedizin.de/resource/supplementary/12943_2014_1387_MOESM2_ESM.pdf/9552862)

**Additional file 2: Figure S2**

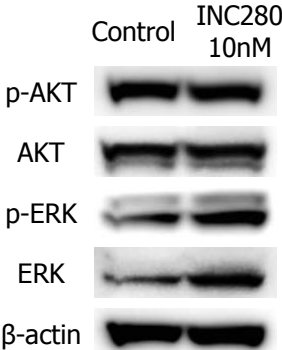

Supplement: MOESM2 [file 9552862]
